# Supplementary material for: Thermosensitive polynorbornene poly(ethylene oxide) nanoparticles loaded with oligoDNAs: an innovative approach for acting on cancer-associated pain
Source: Royal Society of Chemistry journal article supplement (doi:10.1039/c7py01889d), 2017-12-12
Supplement: c7py01889d1.pdf [file c7py01889d1.pdf]

Supplementary information for

Thermosensitive polynorbornene poly(ethylene oxide) nanoparticles  
loaded with oligoDNAs : an innovative approach for acting on cancer-  
associated pain

Loïc Pichavant<sup>1</sup>, Maria José López-González<sup>2</sup>, Alexandre Favereaux<sup>2</sup> et Valérie Héroguez<sup>1</sup>

*1. LCPO, CNRS UMR5629, IPB-ENSCBP, Université de Bordeaux, Pessac, France*

*2. Institut Interdisciplinaire De Neurosciences, CNRS UMR 5297, Université de Bordeaux, Bordeaux, France*

CORRESPONDING AUTHOR Valérie Héroguez, Université de Bordeaux, LCPO, UMR 5629, F-33600 Pessac, France. CNRS, LCPO, UMR 5629, F-33600 Pessac , France

Tel: +33 (0) 5 40 00 22 28

Fax: +33 (0) 5 40 00 84 87

Email: heroguez@enscbp.fr

- **S1:  $^1\text{H}$  NMR spectra**
- **S2: Calculation of the amount of active molecules per NP (Glucosamine; Rhodamine)**
- **S3: UV calibration curve Absorbance at 260 nm vs oligoDNA concentration**
- **S4: Calculation of the amount of entrapped oligoDNA molecules per NP**
- **S5: ACSF preparation and final NPs concentration in ACSF medium**

### S1: $^1\text{H}$ NMR spectra:

- $\alpha$ -norbornenyl- $\omega$ -azide-poly(ethylene oxide) (3)

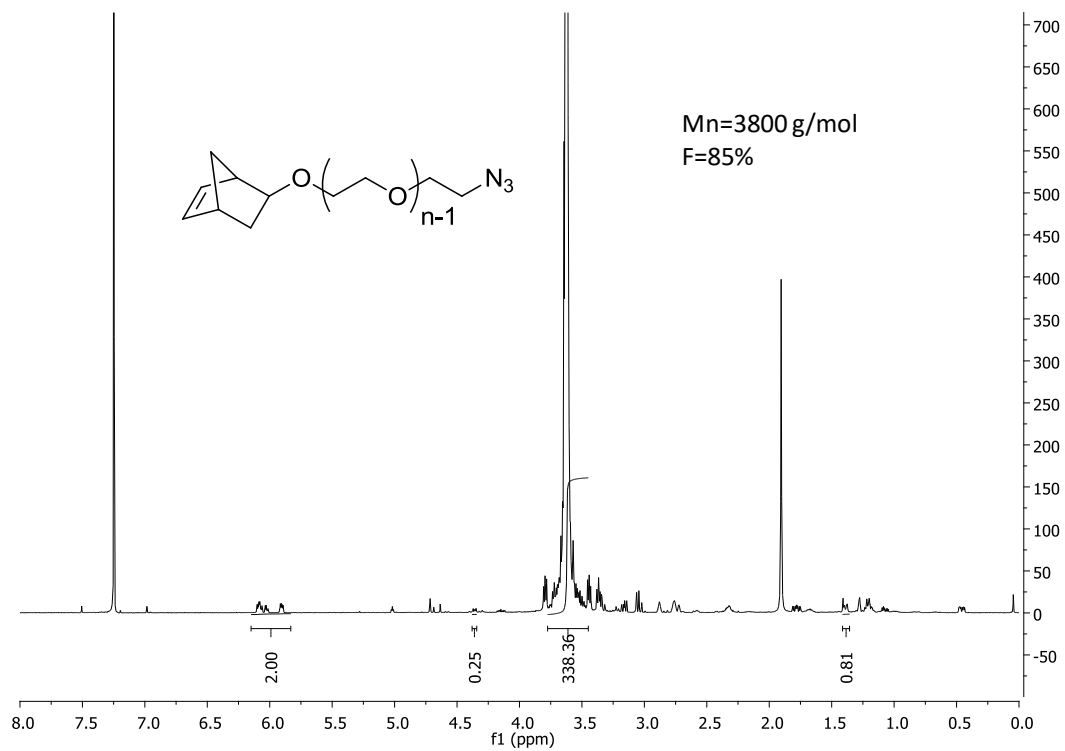

- Propargyl 2-acetamido-3,4,6-tri-*o*-acetyl-2-deoxy- $\alpha$ -D-glucopyranoside (5)

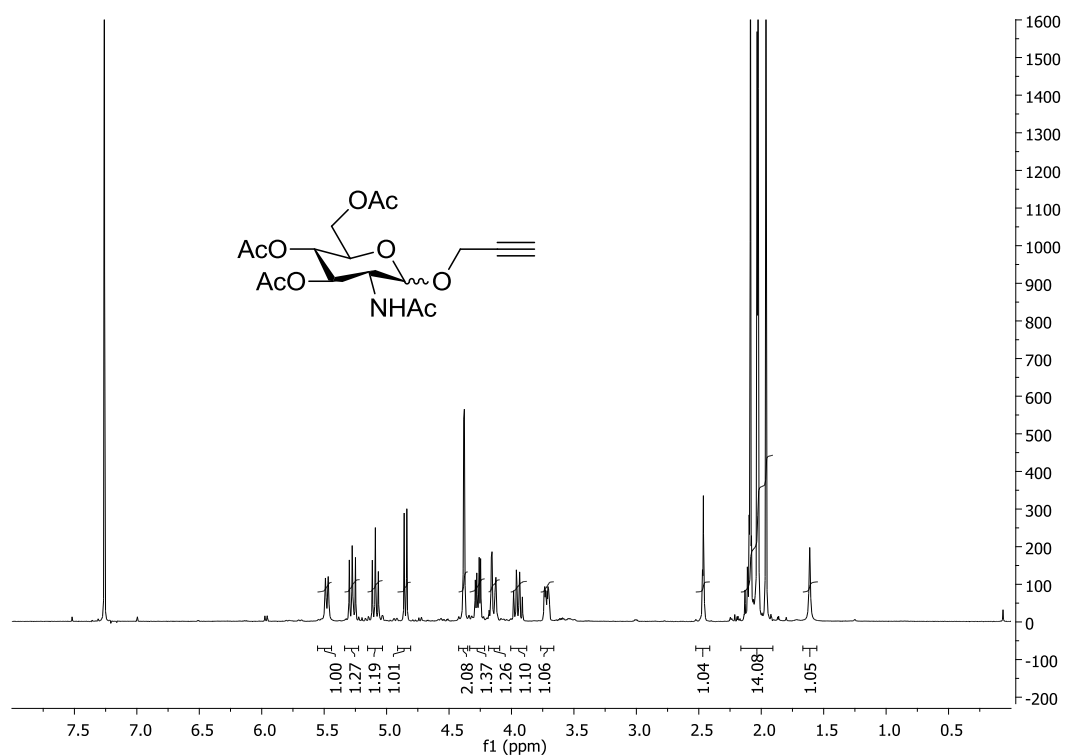

- Propargyl 2-acetamido-2-deoxy- $\beta$ -D-glucopyranoside (6)

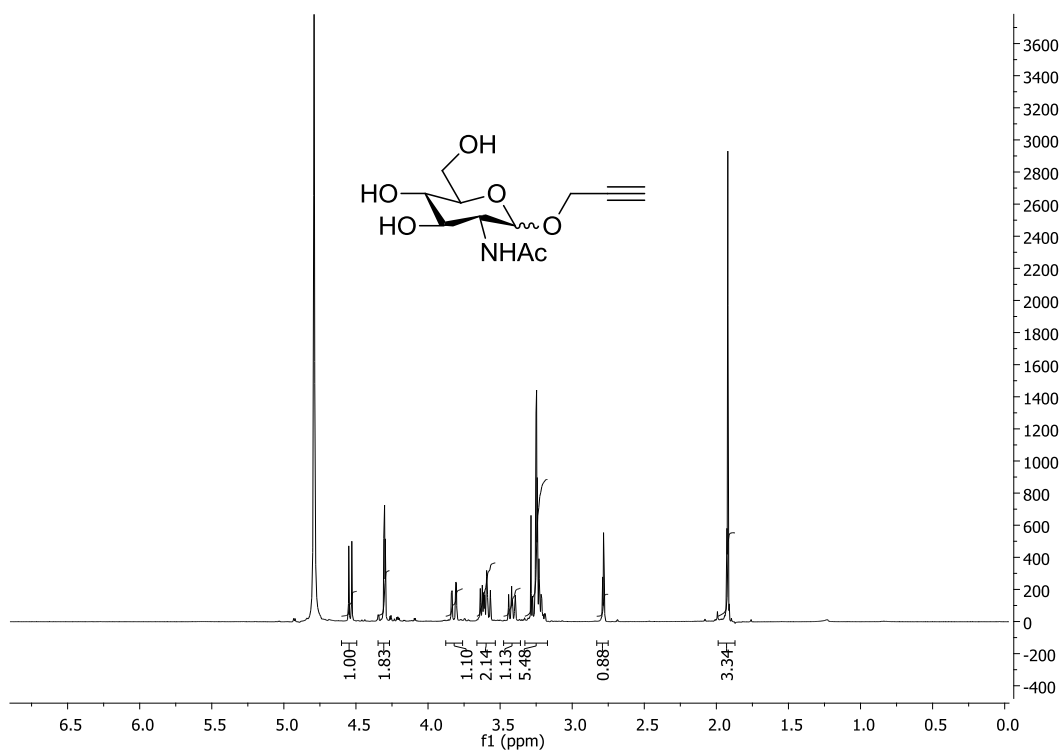

- Acetyl protected  $\alpha$ -norbornenyl- $\omega$ -glucosamine-poly(ethylene oxide) (7)

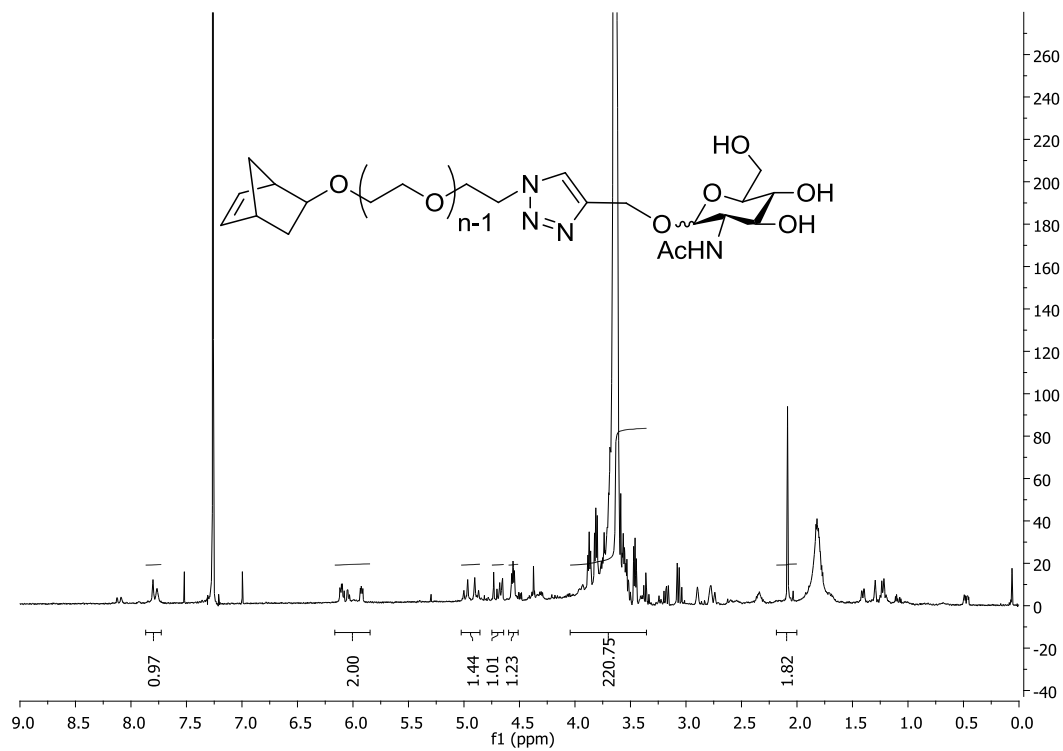

-  $\alpha$ -norbornenyl- $\omega$ -glucosamine-poly(ethylene oxide) (8)

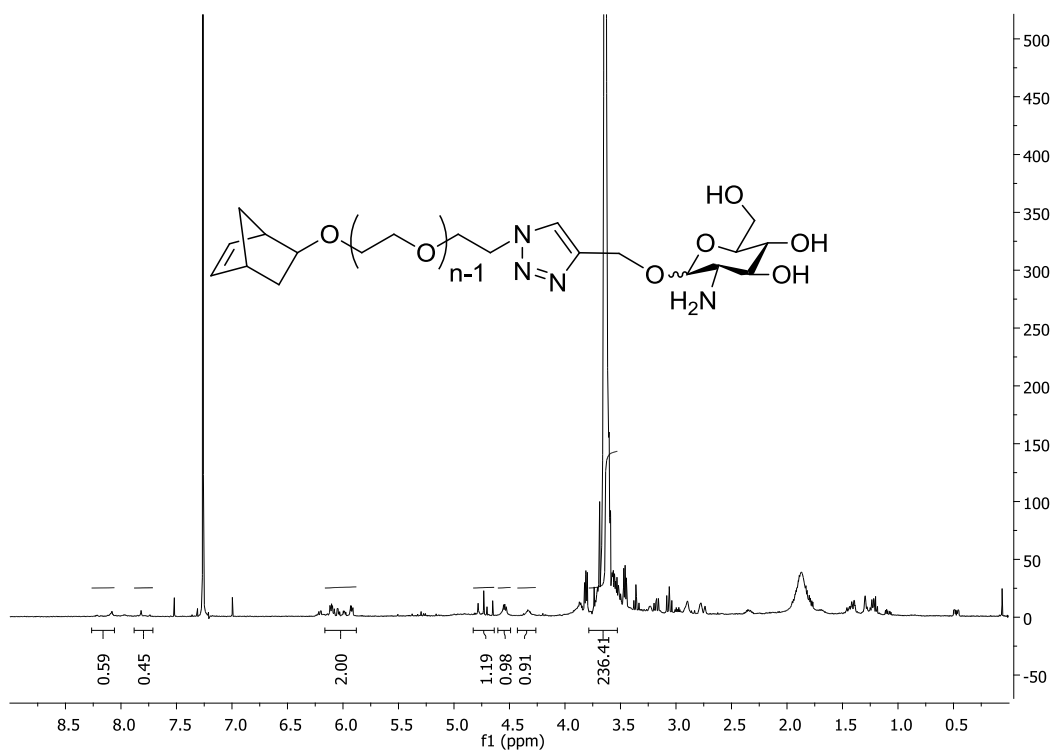

- Pentane-1,5-diy di-norbornene

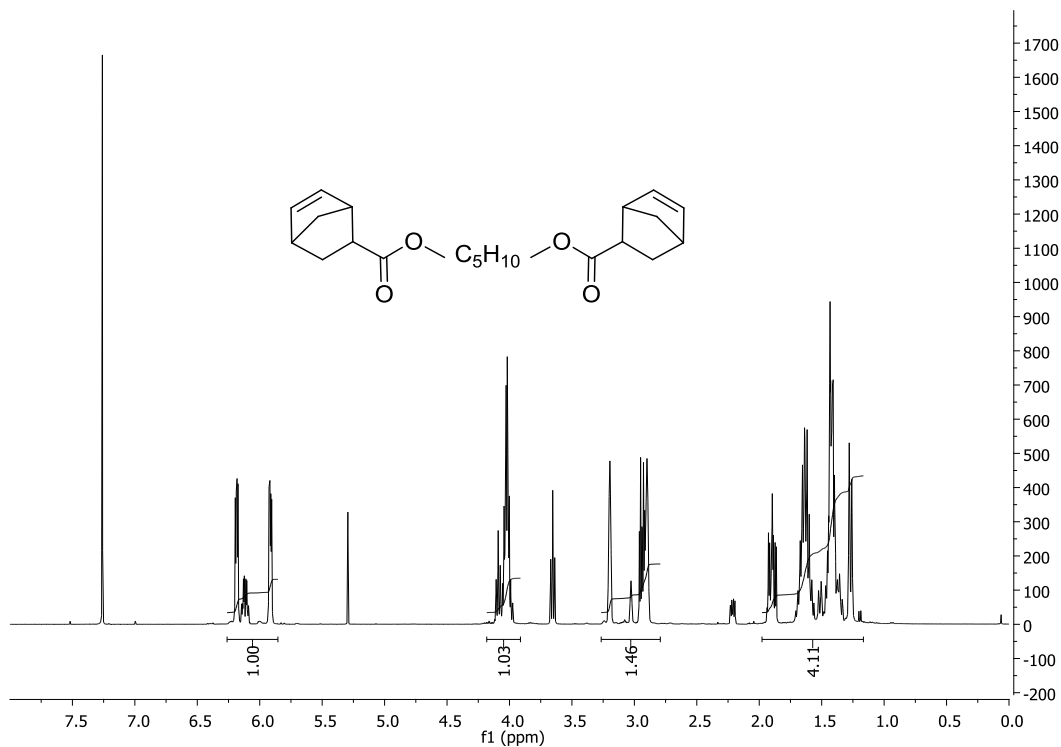

-  $\alpha$ -norbornenyl- $\omega$ -Rhodamine-poly(ethylene oxide) (9)

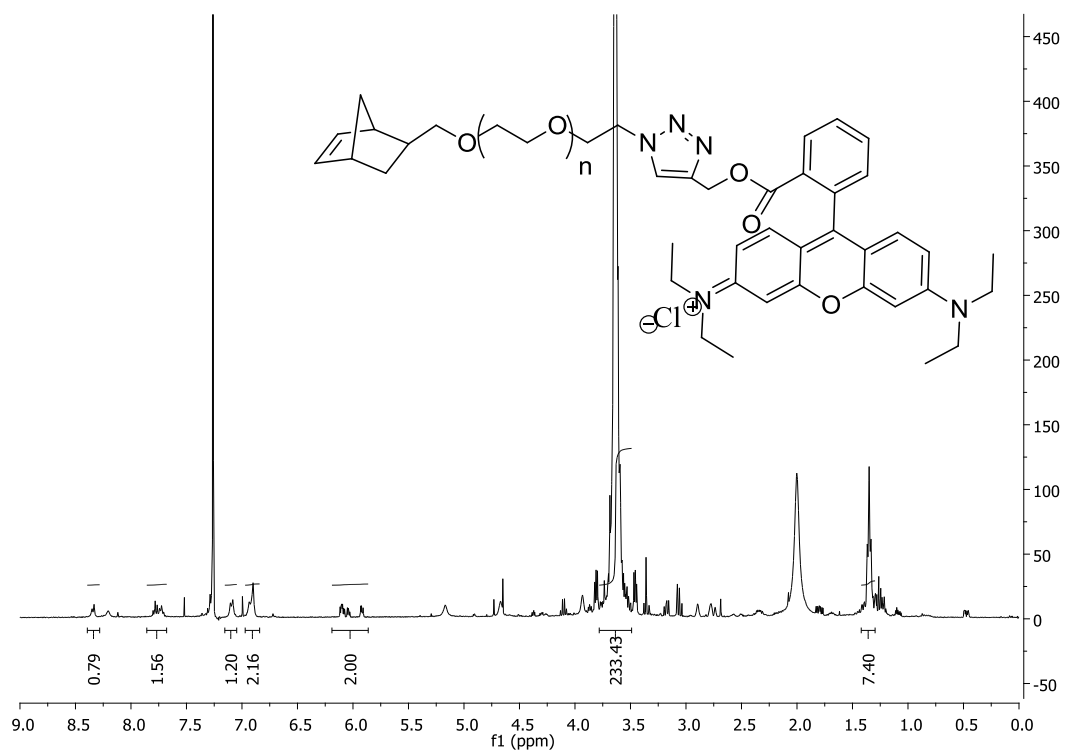

## S2: Calculation of the amount of active molecules per NP (Glucosamine; Rhodamine)

To determine the amount of active molecules per NP, the active molecule concentration in the latex is first calculated with the following equation:

$$C_i = \frac{\pi \times F_i \times n_{Macro,i} \times M_i}{m_{Nb} + \pi \times m_{Macro,i}} \quad (\text{in gram of active molecule } i \text{ per gram of latex})$$

(i = Glucosamine or Rhodamine)

With:

- $C_i$ : concentration of active molecule i in the latex (in gram of active molecule i per gram of latex)
- $\pi$ : conversion of macromonomer i
- $F_i$ :  $\omega$  functionalization of macromonomer i
- $n_{Macro,i}$ : initial amount of macromonomer i
- $M_i$ : molecular weight of active molecule i
- $m_{Nb}$ : initial weight of norbornene
- $m_{Macro,i}$ : initial weight of macromonomer i

Then, the amount of molecule i per NP can be approximated with the following equation:

$$N_i/NP = \frac{C_i \times \rho_{NP} \times V_{NP} \times N_A}{M_i} \quad (\text{molecules per NP})$$

With :

- $N_i/NP$ : amount of molecule i per NP
- $\rho_{NP}$ : latex density approximated to equal to 1 g/mL
- $V_{NP}$ : volume of a NP ( $V_{NP} = \pi D_{NP}^3 / 6$ ) ( $D_{NP}$ : diameter of a NP measured by DLS)
- $N_A$ : Avogadro number
- $M_i$ : molecular weight of active molecule i

S3: UV calibration curve Absorbance at 260 nm vs oligoDNA concentration

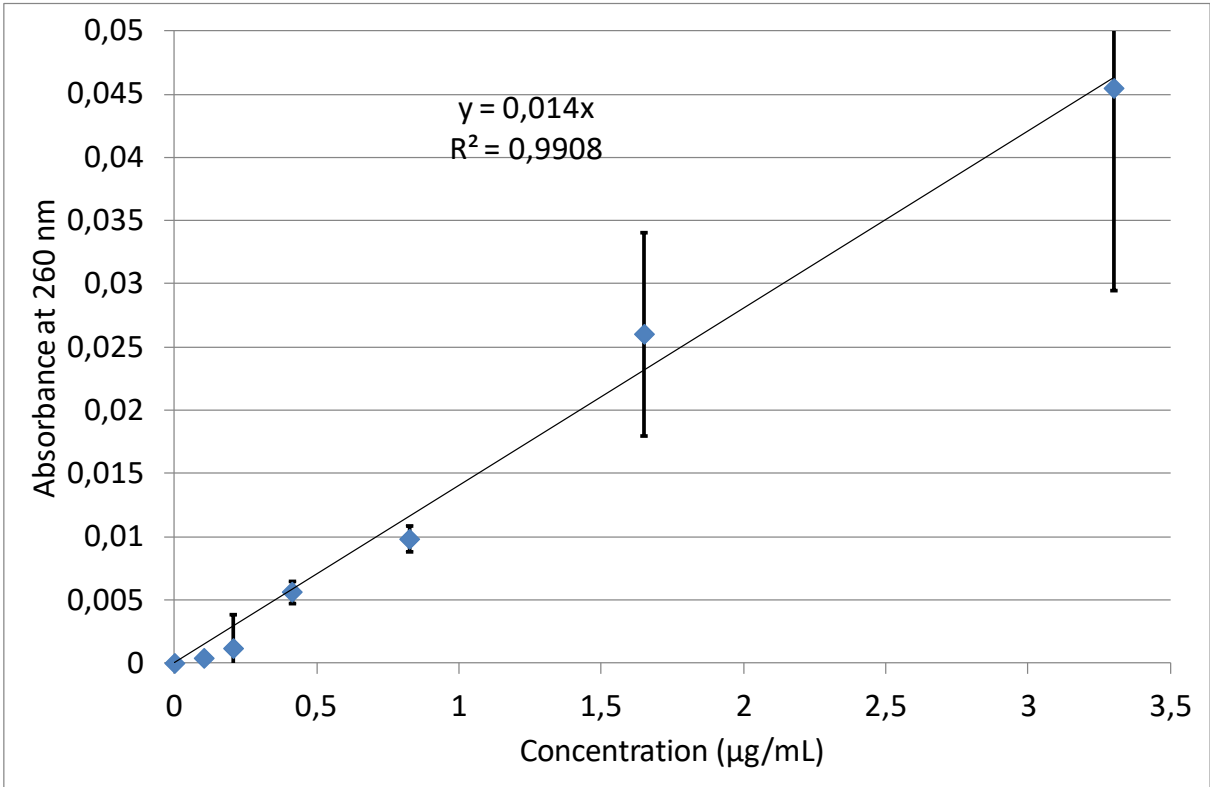



#### S4: Calculation of the amount of entrapped oligoDNA molecules per NP

The amount of entrapped oligoDNA molecules per NP is calculated with the following equation:

$$N_{oligoDNA/NP} = \frac{\%_{ent} \times V_{NP} \times \rho_{NP} \times [oligoDNA] \times V_{oligoDNA} \times N_A}{M_{oligoDNA} \times [m_{Nb} + \pi_{CL} \times m_{CL} + \pi_{Macro} \times m_{Macro}]}$$

With:

- $\%_{ent}$ : percentage of entrapped oligoDNA molecules during the reaction
- $N_{oligoDNA/NP}$ : the amount of entrapped oligoDNA molecules per NP
- $\rho_{NP}$ : latex density approximated to equal to 1 g/mL
- $V_{NP}$ : volume of a NP ( $V_{NP} = \pi D_{NP}^3 / 6$ ) ( $D_{NP}$ : diameter of a NP measured by DLS)
- $[oligoDNA]$ : concentration of oligoDNA solution (1445  $\mu\text{g/mL}$ )
- $V_{oligoDNA}$ : volume of the oligoDNA solution injected during the reaction
- $N_A$ : Avogadro number
- $M_{oligoDNA}$ : molecular weight of the oligoDNAs
- $m_{Nb}$ : initial weight of norbornene
- $\pi_{CL}$ : conversion of the crosslinker
- $m_{CL}$ : initial weight of crosslinker
- $\pi_{Macro}$ : conversion of the macromonomer
- $m_{Macro}$ : initial weight of macromonomer

## S5: ACSF preparation

| products                             | Concentration (mM) |
|--------------------------------------|--------------------|
| NaCl                                 | 130.5              |
| KCl                                  | 2.4                |
| MgSO <sub>4</sub> ·7H <sub>2</sub> O | 1.3                |
| KH <sub>2</sub> PO <sub>4</sub>      | 1.2                |
| HEPES                                | 1.25               |
| CaCl <sub>2</sub>                    | 2.4                |
| Glucose                              | 10                 |
| NaHCO <sub>3</sub>                   | 19.5               |

The final NPs concentration in the ACSF medium ( $[NPs]_{ACSF}^f$ ; NPs/mL) can be calculated with the following equation:

$$[NPs]_{ACSF}^f = \frac{(m_{Nb} + \pi_{CL}m_{CL} + \pi_{macro}m_{macro})}{V_{NP}\rho_{NP}V_{ACSF}}$$

With:

- $m_{Nb}$ : initial weight of norbornene
- $\pi_{CL}$ : conversion of the crosslinker
- $m_{CL}$ : initial weight of crosslinker
- $\pi_{Macro}$ : conversion of the macromonomer
- $m_{Macro}$ : initial weight of macromonomer
- $\rho_{NP}$ : latex density approximated to equal to 1 g/mL
- $V_{NP}$ : volume of a NP ( $V_{NP}=\pi D_{NP}^3/6$ ) ( $D_{NP}$ : diameter of a NP measured by DLS)
- $V_{ACSF}$ : volume of ACSF solution

And the values of these concentrations for each system are summarized in the following table:

| System                    | NP-OH               | NP-OH-CL 5w-%       | NP-GA               |
|---------------------------|---------------------|---------------------|---------------------|
| $[NPs]_{ACSF}^f$ (NPs/mL) | $5.5 \cdot 10^{11}$ | $2.4 \cdot 10^{11}$ | $4.1 \cdot 10^{11}$ |
